# Supplementary material
Source: HighWire-hosted journal article supplement (https://www.cmajopen.ca/highwire/filestream/90716/field_highwire_adjunct_files/1/open-2022-0239-1-at.pdf)
Supplement: open-2022-0239-1-at.pdf [file open-2022-0239-1-at.pdf]

Supplemental Figure 1: Ontario Pandemic-Related Restrictions Timeline:

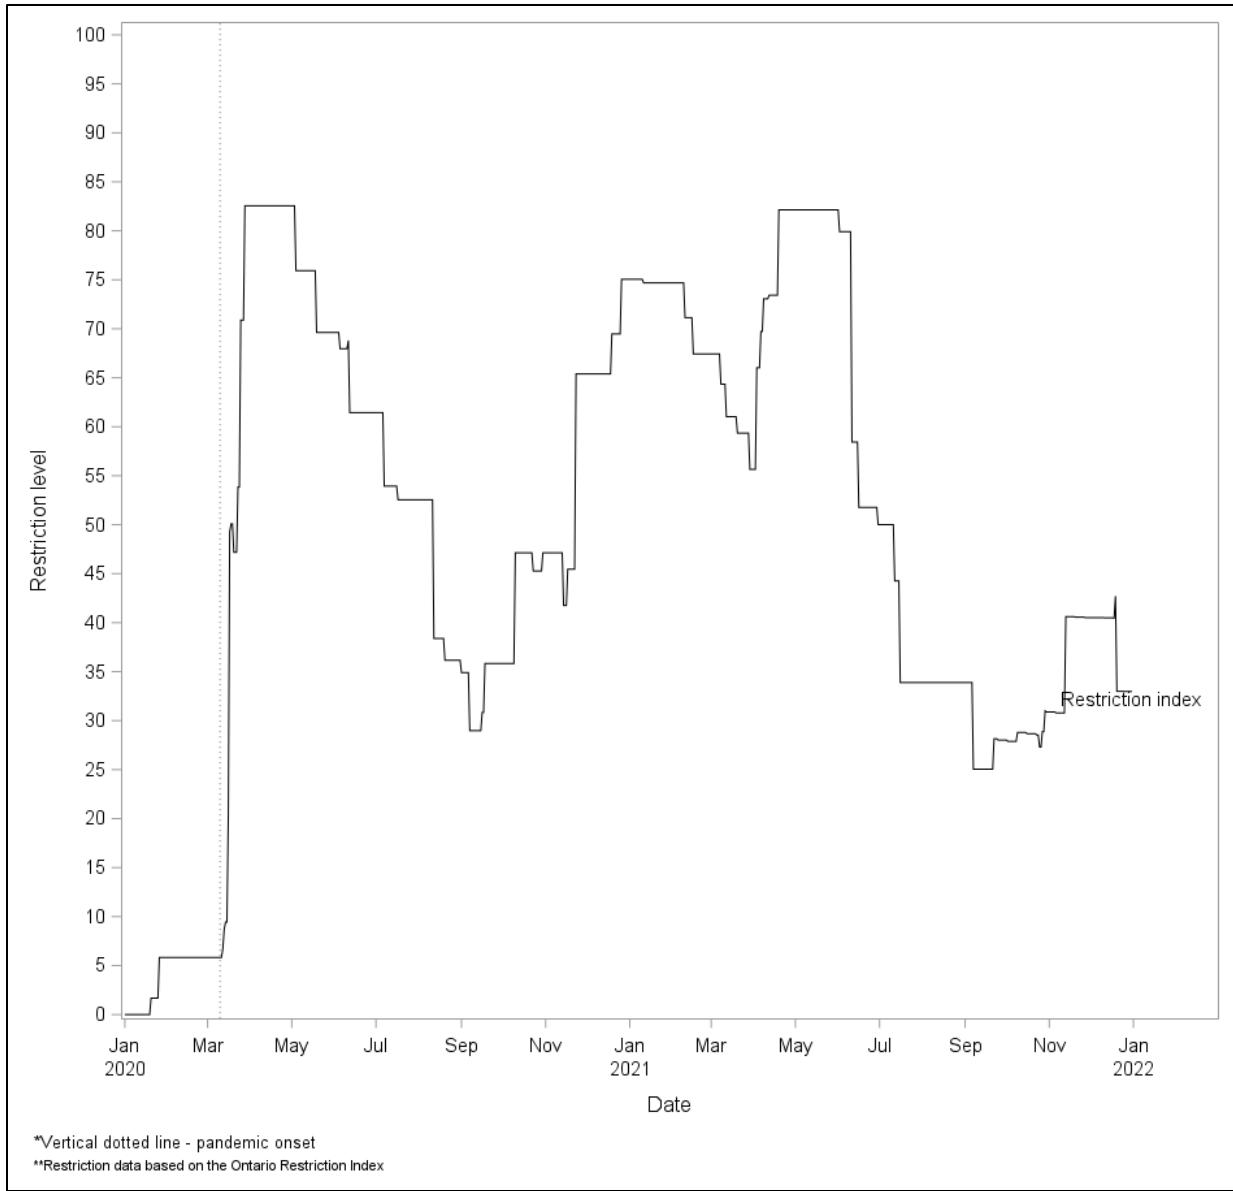

Supplemental Table 1: Proportion of all in-person and virtual mental health outpatient visits during the study period

| Cohort                                                         | Date (quarters) | In-person |         | Virtual |         | Total   |
|----------------------------------------------------------------|-----------------|-----------|---------|---------|---------|---------|
|                                                                |                 | N         | (%)     | N       | (%)     | N       |
| Birthing parents with younger children (0-5 years of age)      | Q1 2016         | 105,992   | 91.6%   | 9,669   | 8.4%    | 115,661 |
|                                                                | Q2 2016         | 99,917    | 90.9%   | 10,017  | 9.1%    | 109,934 |
|                                                                | Q3 2016         | 104,600   | 91.3%   | 9,922   | 8.7%    | 114,522 |
|                                                                | Q4 2016         | 98,073    | 90.6%   | 10,166  | 9.4%    | 108,239 |
|                                                                | Q1 2017         | 106,553   | 90.9%   | 10,712  | 9.1%    | 117,265 |
|                                                                | Q2 2017         | 100,669   | 90.2%   | 10,944  | 9.8%    | 111,613 |
|                                                                | Q3 2017         | 105,927   | 90.5%   | 11,135  | 9.5%    | 117,062 |
|                                                                | Q4 2017         | 94,917    | 89.7%   | 10,949  | 10.3%   | 105,866 |
|                                                                | Q1 2018         | 104,228   | 89.8%   | 11,803  | 10.2%   | 116,031 |
|                                                                | Q2 2018         | 98,556    | 89.3%   | 11,798  | 10.7%   | 110,354 |
|                                                                | Q3 2018         | 103,697   | 89.5%   | 12,157  | 10.5%   | 115,854 |
|                                                                | Q4 2018         | 91,551    | 88.2%   | 12,211  | 11.8%   | 103,762 |
|                                                                | Q1 2019         | 101,591   | 88.7%   | 13,005  | 11.3%   | 114,596 |
|                                                                | Q2 2019         | 93,798    | 88.0%   | 12,845  | 12.0%   | 106,643 |
|                                                                | Q3 2019         | 100,830   | 88.7%   | 12,795  | 11.3%   | 113,625 |
|                                                                | Q4 2019         | 91,323    | 87.1%   | 13,497  | 12.9%   | 104,820 |
|                                                                | Q1 2020         | 32,397    | 27.2%   | 86,758  | 72.8%   | 119,155 |
|                                                                | Q2 2020         | 28,144    | 22.9%   | 94,599  | 77.1%   | 122,743 |
|                                                                | Q3 2020         | 33,195    | 25.5%   | 96,835  | 74.5%   | 130,030 |
|                                                                | Q4 2020         | 27,888    | 21.5%   | 101,590 | 78.5%   | 129,478 |
| Q1 2021                                                        | 30,105          | 22.1%     | 106,358 | 77.9%   | 136,463 |         |
| Q2 2021                                                        | 30,705          | 26.3%     | 86,179  | 73.7%   | 116,884 |         |
| Q3 2021                                                        | 36,605          | 30.8%     | 82,182  | 69.2%   | 118,787 |         |
| Birthing parents with school-aged children (6-12 years of age) | Q1 2016         | 122,322   | 92.1%   | 10,553  | 7.9%    | 132,875 |
|                                                                | Q2 2016         | 112,402   | 91.0%   | 11,132  | 9.0%    | 123,534 |
|                                                                | Q3 2016         | 121,511   | 91.5%   | 11,249  | 8.5%    | 132,760 |
|                                                                | Q4 2016         | 112,551   | 90.6%   | 11,704  | 9.4%    | 124,255 |
|                                                                | Q1 2017         | 123,728   | 91.0%   | 12,183  | 9.0%    | 135,911 |
|                                                                | Q2 2017         | 114,650   | 90.2%   | 12,401  | 9.8%    | 127,051 |
|                                                                | Q3 2017         | 122,842   | 90.5%   | 12,873  | 9.5%    | 135,715 |
|                                                                | Q4 2017         | 109,260   | 89.8%   | 12,470  | 10.2%   | 121,730 |
|                                                                | Q1 2018         | 121,603   | 89.7%   | 13,982  | 10.3%   | 135,585 |
|                                                                | Q2 2018         | 111,703   | 88.9%   | 13,969  | 11.1%   | 125,672 |
|                                                                | Q3 2018         | 119,739   | 89.2%   | 14,515  | 10.8%   | 134,254 |
|                                                                | Q4 2018         | 105,981   | 87.8%   | 14,780  | 12.2%   | 120,761 |
|                                                                | Q1 2019         | 120,439   | 88.3%   | 15,978  | 11.7%   | 136,417 |
|                                                                | Q2 2019         | 107,964   | 86.9%   | 16,313  | 13.1%   | 124,277 |
|                                                                | Q3 2019         | 118,330   | 87.9%   | 16,308  | 12.1%   | 134,638 |
|                                                                | Q4 2019         | 107,254   | 85.9%   | 17,546  | 14.1%   | 124,800 |
|                                                                | Q1 2020         | 37,237    | 27.3%   | 99,095  | 72.7%   | 136,332 |
|                                                                | Q2 2020         | 31,174    | 22.5%   | 107,646 | 77.5%   | 138,820 |
|                                                                | Q3 2020         | 37,412    | 24.9%   | 112,675 | 75.1%   | 150,087 |
|                                                                | Q4 2020         | 30,608    | 20.8%   | 116,673 | 79.2%   | 147,281 |
| Q1 2021                                                        | 34,119          | 21.6%     | 124,056 | 78.4%   | 158,175 |         |
| Q2 2021                                                        | 35,834          | 25.9%     | 102,639 | 74.1%   | 138,473 |         |
| Q3 2021                                                        | 45,185          | 30.6%     | 102,509 | 69.4%   | 147,694 |         |

Supplemental Table 2: OHIP Service and Diagnostic Codes:

| Study Outcome Categories                | OHIP Diagnostic Codes for Outcomes                             | Individual Codes and Their Description |                                             |
|-----------------------------------------|----------------------------------------------------------------|----------------------------------------|---------------------------------------------|
| Mood and Anxiety Disorders              | OHIP DXCODES: 296, 300, 311                                    | 296                                    | Bipolar Disorder                            |
|                                         |                                                                | 300                                    | Anxiety and related disorders               |
|                                         |                                                                | 311                                    | Depressive or other non-psychotic disorders |
| Other non-psychotic and other disorders | OHIP DXCODES: 301, 302, 306, 309                               | 301                                    | Personality Disorder                        |
|                                         |                                                                | 302                                    | Sexual deviations                           |
|                                         |                                                                | 306                                    | Psychosomatic illness                       |
|                                         |                                                                | 309                                    | Adjustment reaction                         |
| Alcohol/substance abuse disorder        | OHIP DXCODES: 303, 304                                         | 303                                    | Alcoholism                                  |
|                                         |                                                                | 304                                    | Drug dependence                             |
| Social Problems                         | OHIP DXCODES: 897, 898, 899, 900, 901, 902, 904, 905, 906, 909 | 897                                    | Economic problems                           |
|                                         |                                                                | 898                                    | Marital difficulties                        |
|                                         |                                                                | 899                                    | Parent-child problems                       |
|                                         |                                                                | 900                                    | Problems with aged parents or in-laws       |
|                                         |                                                                | 901                                    | Family disruption/divorce                   |
|                                         |                                                                | 902                                    | Education problems                          |
|                                         |                                                                | 904                                    | Social maladjustment                        |
|                                         |                                                                | 905                                    | Occupational problems                       |
|                                         |                                                                | 906                                    | Legal problems                              |
| 909                                     | Other problems of social adjustment                            |                                        |                                             |

Supplemental Figure 2: Rates of Total Outpatient Visits by Age of Birthing Parents

| Age group                                                             | Date (quarters)   | Rate/1000 |          | Absolute Rate Difference (95% CI) | Incidence Rate Ratio (95% CI) |
|-----------------------------------------------------------------------|-------------------|-----------|----------|-----------------------------------|-------------------------------|
|                                                                       |                   | Observed  | Expected |                                   |                               |
| <i>Birthing parents with younger children (0-5 years of age)</i>      |                   |           |          |                                   |                               |
| <18                                                                   | Mar-May 2020      | 245.4     | 265.8    | -20.45 (-41.94 to -0.56)          | 0.92 (0.85 to 1.00)           |
|                                                                       | Jun-Aug 2020      | 280.4     | 259.6    | 20.80 (-0.20 to 40.23)            | 1.08 (1.00 to 1.17)           |
|                                                                       | Sept-Nov 2020     | 277.4     | 274.5    | 2.88 (-19.46 to 23.55)            | 1.01 (0.93 to 1.09)           |
|                                                                       | Dec 2020-Feb 2021 | 314.1     | 270.4    | 43.72 (21.02 to 64.66)            | 1.16 (1.07 to 1.26)           |
|                                                                       | Mar-May 2021      | 326.4     | 289.6    | 36.80 (7.17 to 63.69)             | 1.13 (1.02 to 1.24)           |
|                                                                       | Jun-Aug 2021      | 293.3     | 282.8    | 10.48 (-18.56 to 36.82)           | 1.04 (0.94 to 1.14)           |
|                                                                       | Sept-Nov 2021     | 279.7     | 299.0    | -19.36 (-50.53 to 8.87)           | 0.94 (0.85 to 1.03)           |
| 18-26                                                                 | Mar-May 2020      | 232.0     | 233.4    | -1.37 (-6.38 to 3.53)             | 0.99 (0.97 to 1.02)           |
|                                                                       | Jun-Aug 2020      | 240.8     | 226.4    | 14.46 (9.60 to 19.23)             | 1.06 (1.04 to 1.09)           |
|                                                                       | Sept-Nov 2020     | 255.3     | 228.9    | 26.44 (21.52 to 31.26)            | 1.12 (1.09 to 1.14)           |
|                                                                       | Dec 2020-Feb 2021 | 252.6     | 211.6    | 41.07 (36.43 to 45.61)            | 1.19 (1.17 to 1.22)           |
|                                                                       | Mar-May 2021      | 265.7     | 229.6    | 36.06 (29.93 to 42.04)            | 1.16 (1.13 to 1.19)           |
|                                                                       | Jun-Aug 2021      | 241.0     | 222.7    | 18.24 (12.28 to 24.04)            | 1.08 (1.05 to 1.11)           |
|                                                                       | Sept-Nov 2021     | 244.8     | 225.2    | 19.57 (13.52 to 25.46)            | 1.09 (1.06 to 1.12)           |
| 27-36                                                                 | Mar-May 2020      | 169.8     | 157.1    | 12.71 (9.31 to 16.04)             | 1.08 (1.06 to 1.10)           |
|                                                                       | Jun-Aug 2020      | 174.4     | 148.1    | 26.40 (23.18 to 29.54)            | 1.18 (1.15 to 1.20)           |
|                                                                       | Sept-Nov 2020     | 183.8     | 155.5    | 28.31 (24.94 to 31.61)            | 1.18 (1.16 to 1.21)           |
|                                                                       | Dec 2020-Feb 2021 | 183.4     | 142.4    | 41.00 (37.88 to 44.05)            | 1.29 (1.26 to 1.32)           |
|                                                                       | Mar-May 2021      | 196.5     | 153.5    | 42.97 (38.84 to 46.99)            | 1.28 (1.25 to 1.31)           |
|                                                                       | Jun-Aug 2021      | 170.6     | 144.7    | 25.93 (22.02 to 29.73)            | 1.18 (1.15 to 1.21)           |
|                                                                       | Sept-Nov 2021     | 179.3     | 152.0    | 27.32 (23.22 to 31.32)            | 1.18 (1.15 to 1.21)           |
| 37-47                                                                 | Mar-May 2020      | 173.9     | 168.2    | 5.74 (0.63 to 10.70)              | 1.03 (1.00 to 1.07)           |
|                                                                       | Jun-Aug 2020      | 176.9     | 155.7    | 21.29 (16.52 to 25.91)            | 1.14 (1.10 to 1.17)           |
|                                                                       | Sept-Nov 2020     | 189.8     | 169.7    | 20.19 (15.00 to 25.23)            | 1.12 (1.09 to 1.15)           |
|                                                                       | Dec 2020-Feb 2021 | 185.0     | 152.5    | 32.51 (27.75 to 37.12)            | 1.21 (1.18 to 1.25)           |
|                                                                       | Mar-May 2021      | 206.2     | 169.9    | 36.29 (29.85 to 42.50)            | 1.21 (1.17 to 1.26)           |
|                                                                       | Jun-Aug 2021      | 180.0     | 157.3    | 22.75 (16.76 to 28.53)            | 1.14 (1.10 to 1.19)           |
|                                                                       | Sept-Nov 2021     | 192.9     | 171.4    | 21.53 (14.99 to 27.82)            | 1.13 (1.08 to 1.17)           |
| <i>Birthing parents with school-aged children (6-12 years of age)</i> |                   |           |          |                                   |                               |
| 18-26                                                                 | Mar-May 2020      | 445.4     | 455.9    | -10.58 (-20.93 to -0.45)          | 0.98 (0.96 to 1.00)           |
|                                                                       | Jun-Aug 2020      | 451.3     | 441.9    | 9.48 (-0.56 to 19.29)             | 1.02 (1.00 to 1.04)           |
|                                                                       | Sept-Nov 2020     | 491.6     | 446.6    | 45.00 (34.78 to 54.98)            | 1.10 (1.08 to 1.13)           |
|                                                                       | Dec 2020-Feb 2021 | 489.8     | 412.7    | 77.16 (67.31 to 86.78)            | 1.19 (1.16 to 1.22)           |
|                                                                       | Mar-May 2021      | 507.2     | 447.1    | 60.16 (47.43 to 72.54)            | 1.13 (1.10 to 1.17)           |
|                                                                       | Jun-Aug 2021      | 459.0     | 433.3    | 25.68 (13.33 to 37.70)            | 1.06 (1.03 to 1.09)           |
|                                                                       | Sept-Nov 2021     | 469.1     | 437.9    | 31.22 (18.56 to 43.54)            | 1.07 (1.04 to 1.10)           |
| 27-36                                                                 | Mar-May 2020      | 233.6     | 229.3    | 4.27 (-1.25 to 9.66)              | 1.02 (0.99 to 1.04)           |
|                                                                       | Jun-Aug 2020      | 237.4     | 213.2    | 24.25 (19.11 to 29.27)            | 1.11 (1.09 to 1.14)           |
|                                                                       | Sept-Nov 2020     | 253.1     | 221.3    | 31.77 (26.44 to 36.97)            | 1.14 (1.12 to 1.17)           |
|                                                                       | Dec 2020-Feb 2021 | 247.7     | 202.0    | 45.68 (40.78 to 50.47)            | 1.23 (1.20 to 1.26)           |
|                                                                       | Mar-May 2021      | 262.6     | 218.2    | 44.36 (37.83 to 50.70)            | 1.20 (1.17 to 1.24)           |
|                                                                       | Jun-Aug 2021      | 233.5     | 202.9    | 30.59 (24.51 to 36.50)            | 1.15 (1.12 to 1.19)           |
|                                                                       | Sept-Nov 2021     | 243.4     | 210.6    | 32.78 (26.47 to 38.91)            | 1.16 (1.12 to 1.19)           |
| 37-47                                                                 | Mar-May 2020      | 168.0     | 163.7    | 4.33 (0.91 to 7.68)               | 1.03 (1.01 to 1.05)           |
|                                                                       | Jun-Aug 2020      | 169.9     | 148.3    | 21.59 (18.47 to 24.64)            | 1.15 (1.12 to 1.17)           |
|                                                                       | Sept-Nov 2020     | 185.0     | 162.4    | 22.52 (19.11 to 25.86)            | 1.14 (1.12 to 1.16)           |
|                                                                       | Dec 2020-Feb 2021 | 180.5     | 146.8    | 33.69 (30.58 to 36.74)            | 1.23 (1.20 to 1.26)           |
|                                                                       | Mar-May 2021      | 197.9     | 162.7    | 35.12 (30.89 to 39.24)            | 1.22 (1.18 to 1.25)           |
|                                                                       | Jun-Aug 2021      | 167.6     | 147.5    | 20.11 (16.26 to 23.86)            | 1.14 (1.11 to 1.17)           |
|                                                                       | Sept-Nov 2021     | 183.2     | 161.5    | 21.67 (17.45 to 25.78)            | 1.13 (1.11 to 1.16)           |
| 48+                                                                   | Mar-May 2020      | 167.8     | 176.0    | -8.18 (-15.41 to -1.23)           | 0.95 (0.92 to 0.99)           |
|                                                                       | Jun-Aug 2020      | 179.3     | 154.5    | 24.70 (18.22 to 30.93)            | 1.16 (1.11 to 1.21)           |
|                                                                       | Sept-Nov 2020     | 191.8     | 174.3    | 17.46 (10.14 to 24.49)            | 1.10 (1.06 to 1.15)           |
|                                                                       | Dec 2020-Feb 2021 | 177.8     | 155.4    | 22.32 (15.48 to 28.87)            | 1.14 (1.10 to 1.19)           |
|                                                                       | Mar-May 2021      | 201.9     | 174.3    | 27.54 (18.55 to 36.10)            | 1.16 (1.10 to 1.22)           |
|                                                                       | Jun-Aug 2021      | 170.9     | 153.1    | 17.79 (9.78 to 25.41)             | 1.12 (1.06 to 1.17)           |
|                                                                       | Sept-Nov 2021     | 195.4     | 172.6    | 22.76 (13.69 to 31.38)            | 1.13 (1.08 to 1.19)           |

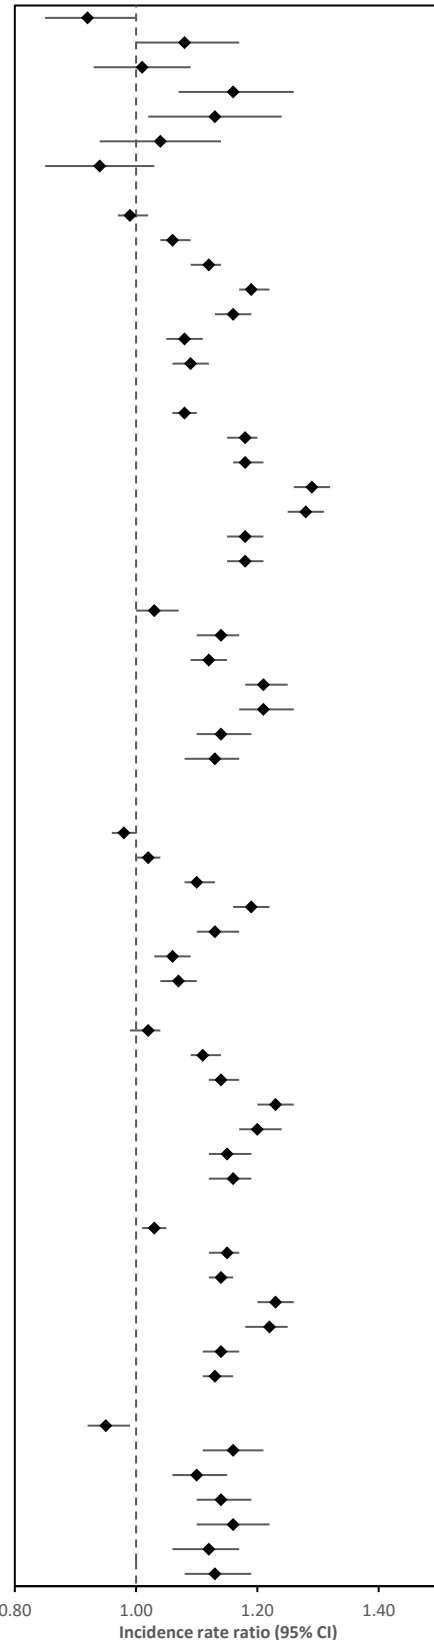

Supplemental Figure 3: Rates of Total Outpatient Visits by Material Deprivation

| Deprivation                                                    | Quarters          | Date (quarters) | Rate/1000 |          | Absolute Rate Difference (95% CI) | Incidence Rate Ratio (95% CI) |
|----------------------------------------------------------------|-------------------|-----------------|-----------|----------|-----------------------------------|-------------------------------|
|                                                                |                   |                 | Observed  | Expected |                                   |                               |
| Birthing parents with younger children (0-5 years of age)      |                   |                 |           |          |                                   |                               |
| 1 (least)                                                      | Mar-May 2020      |                 | 158.0     | 144.5    | 13.49 (9.84 to 17.05)             | 1.09 (1.07 to 1.12)           |
|                                                                | Jun-Aug 2020      |                 | 159.8     | 134.8    | 24.93 (21.50 to 28.28)            | 1.18 (1.16 to 1.22)           |
|                                                                | Sept-Nov 2020     |                 | 173.4     | 146.2    | 27.22 (23.51 to 30.85)            | 1.19 (1.16 to 1.22)           |
|                                                                | Dec 2020-Feb 2021 |                 | 172.4     | 133.0    | 39.37 (35.92 to 42.73)            | 1.30 (1.26 to 1.33)           |
|                                                                | Mar-May 2021      |                 | 187.1     | 145.4    | 41.64 (37.06 to 46.08)            | 1.29 (1.25 to 1.33)           |
| 2                                                              | Jun-Aug 2021      |                 | 162.0     | 135.7    | 26.35 (22.05 to 30.52)            | 1.19 (1.16 to 1.23)           |
|                                                                | Sept-Nov 2021     |                 | 173.8     | 147.1    | 26.62 (21.95 to 31.15)            | 1.18 (1.14 to 1.22)           |
|                                                                | Mar-May 2020      |                 | 160.6     | 147.1    | 13.51 (9.61 to 17.31)             | 1.09 (1.06 to 1.12)           |
|                                                                | Jun-Aug 2020      |                 | 164.2     | 137.7    | 26.45 (22.78 to 30.03)            | 1.19 (1.16 to 1.22)           |
|                                                                | Sept-Nov 2020     |                 | 177.3     | 146.9    | 30.40 (26.48 to 34.21)            | 1.21 (1.18 to 1.24)           |
| 3                                                              | Dec 2020-Feb 2021 |                 | 177.9     | 135.2    | 42.66 (38.99 to 46.24)            | 1.32 (1.28 to 1.35)           |
|                                                                | Mar-May 2021      |                 | 194.8     | 147.0    | 47.83 (42.98 to 52.53)            | 1.33 (1.28 to 1.37)           |
|                                                                | Jun-Aug 2021      |                 | 165.6     | 137.6    | 28.01 (23.45 to 32.43)            | 1.20 (1.16 to 1.24)           |
|                                                                | Sept-Nov 2021     |                 | 175.3     | 146.8    | 28.53 (23.65 to 33.25)            | 1.19 (1.16 to 1.23)           |
|                                                                | Mar-May 2020      |                 | 170.1     | 160.5    | 9.54 (5.77 to 13.23)              | 1.06 (1.04 to 1.08)           |
| 4                                                              | Jun-Aug 2020      |                 | 174.2     | 151.8    | 22.39 (18.81 to 25.89)            | 1.15 (1.12 to 1.17)           |
|                                                                | Sept-Nov 2020     |                 | 185.1     | 159.9    | 25.28 (21.50 to 28.97)            | 1.16 (1.13 to 1.19)           |
|                                                                | Dec 2020-Feb 2021 |                 | 185.3     | 145.8    | 39.46 (35.93 to 42.91)            | 1.27 (1.24 to 1.30)           |
|                                                                | Mar-May 2021      |                 | 199.4     | 159.8    | 39.62 (34.93 to 44.17)            | 1.25 (1.21 to 1.28)           |
|                                                                | Jun-Aug 2021      |                 | 172.8     | 151.1    | 21.68 (17.24 to 25.99)            | 1.14 (1.11 to 1.18)           |
| 5 (most)                                                       | Sept-Nov 2021     |                 | 182.7     | 159.1    | 23.54 (18.84 to 28.11)            | 1.15 (1.12 to 1.18)           |
|                                                                | Mar-May 2020      |                 | 185.9     | 178.9    | 6.96 (1.52 to 12.25)              | 1.04 (1.01 to 1.07)           |
|                                                                | Jun-Aug 2020      |                 | 193.1     | 170.1    | 23.02 (17.84 to 28.06)            | 1.14 (1.10 to 1.17)           |
|                                                                | Sept-Nov 2020     |                 | 203.8     | 177.7    | 26.08 (20.67 to 31.33)            | 1.15 (1.11 to 1.18)           |
|                                                                | Dec 2020-Feb 2021 |                 | 202.2     | 162.7    | 39.46 (34.42 to 44.34)            | 1.24 (1.21 to 1.28)           |
| 5 (most)                                                       | Mar-May 2021      |                 | 213.6     | 177.4    | 36.20 (29.48 to 42.68)            | 1.20 (1.16 to 1.25)           |
|                                                                | Jun-Aug 2021      |                 | 191.1     | 168.6    | 22.49 (16.09 to 28.65)            | 1.13 (1.09 to 1.18)           |
|                                                                | Sept-Nov 2021     |                 | 199.9     | 176.2    | 23.75 (17.06 to 30.20)            | 1.13 (1.09 to 1.18)           |
|                                                                | Mar-May 2020      |                 | 235.8     | 239.6    | -3.76 (-10.43 to 2.74)            | 0.98 (0.96 to 1.01)           |
|                                                                | Jun-Aug 2020      |                 | 247.4     | 229.9    | 17.50 (11.08 to 23.76)            | 1.08 (1.05 to 1.11)           |
| 5 (most)                                                       | Sept-Nov 2020     |                 | 254.8     | 236.1    | 18.73 (12.13 to 25.15)            | 1.08 (1.05 to 1.11)           |
|                                                                | Dec 2020-Feb 2021 |                 | 252.4     | 216.6    | 35.79 (29.65 to 41.77)            | 1.17 (1.13 to 1.20)           |
|                                                                | Mar-May 2021      |                 | 266.6     | 234.4    | 32.16 (24.03 to 40.03)            | 1.14 (1.10 to 1.18)           |
|                                                                | Jun-Aug 2021      |                 | 242.3     | 224.9    | 17.38 (9.55 to 24.94)             | 1.08 (1.04 to 1.11)           |
|                                                                | Sept-Nov 2021     |                 | 241.3     | 231.0    | 10.35 (2.30 to 18.12)             | 1.04 (1.01 to 1.08)           |
| Birthing parents with school-aged children (6-12 years of age) |                   |                 |           |          |                                   |                               |
| 1 (least)                                                      | Mar-May 2020      |                 | 162.7     | 161.7    | 0.98 (-2.73 to 4.61)              | 1.01 (0.98 to 1.03)           |
|                                                                | Jun-Aug 2020      |                 | 164.3     | 145.5    | 18.74 (15.38 to 22.02)            | 1.13 (1.10 to 1.15)           |
|                                                                | Sept-Nov 2020     |                 | 184.7     | 161.0    | 23.67 (19.96 to 27.29)            | 1.15 (1.12 to 1.17)           |
|                                                                | Dec 2020-Feb 2021 |                 | 181.4     | 144.8    | 36.57 (33.17 to 39.89)            | 1.25 (1.22 to 1.28)           |
|                                                                | Mar-May 2021      |                 | 201.3     | 162.1    | 39.16 (34.52 to 43.66)            | 1.24 (1.21 to 1.28)           |
| 2                                                              | Jun-Aug 2021      |                 | 168.2     | 145.9    | 22.34 (18.15 to 26.41)            | 1.15 (1.12 to 1.19)           |
|                                                                | Sept-Nov 2021     |                 | 188.0     | 161.4    | 26.61 (21.98 to 31.12)            | 1.16 (1.13 to 1.20)           |
|                                                                | Mar-May 2020      |                 | 172.3     | 167.0    | 5.31 (0.98 to 9.52)               | 1.03 (1.01 to 1.06)           |
|                                                                | Jun-Aug 2020      |                 | 176.4     | 152.7    | 23.75 (19.77 to 27.62)            | 1.16 (1.13 to 1.19)           |
|                                                                | Sept-Nov 2020     |                 | 190.6     | 168.0    | 22.67 (18.30 to 26.93)            | 1.13 (1.11 to 1.16)           |
| 3                                                              | Dec 2020-Feb 2021 |                 | 187.4     | 152.3    | 35.11 (31.09 to 39.04)            | 1.23 (1.20 to 1.26)           |
|                                                                | Mar-May 2021      |                 | 205.5     | 167.3    | 38.26 (32.87 to 43.49)            | 1.23 (1.19 to 1.27)           |
|                                                                | Jun-Aug 2021      |                 | 174.6     | 152.9    | 21.63 (16.67 to 26.43)            | 1.14 (1.11 to 1.18)           |
|                                                                | Sept-Nov 2021     |                 | 187.2     | 168.3    | 18.97 (13.50 to 24.26)            | 1.11 (1.08 to 1.15)           |
|                                                                | Mar-May 2020      |                 | 187.2     | 186.7    | 0.47 (-4.43 to 5.24)              | 1.00 (0.98 to 1.03)           |
| 4                                                              | Jun-Aug 2020      |                 | 191.2     | 172.0    | 19.13 (14.60 to 23.54)            | 1.11 (1.08 to 1.14)           |
|                                                                | Sept-Nov 2020     |                 | 206.9     | 185.0    | 21.83 (16.96 to 26.58)            | 1.12 (1.09 to 1.15)           |
|                                                                | Dec 2020-Feb 2021 |                 | 203.7     | 168.7    | 35.09 (30.57 to 39.49)            | 1.21 (1.18 to 1.24)           |
|                                                                | Mar-May 2021      |                 | 220.3     | 187.3    | 33.06 (26.94 to 38.98)            | 1.18 (1.14 to 1.21)           |
|                                                                | Jun-Aug 2021      |                 | 191.8     | 172.5    | 19.27 (13.62 to 24.74)            | 1.11 (1.08 to 1.15)           |
| 5 (most)                                                       | Sept-Nov 2021     |                 | 206.5     | 185.6    | 20.93 (14.83 to 26.83)            | 1.11 (1.08 to 1.15)           |
|                                                                | Mar-May 2020      |                 | 226.4     | 223.1    | 3.21 (-3.69 to 9.89)              | 1.01 (0.98 to 1.05)           |
|                                                                | Jun-Aug 2020      |                 | 227.7     | 208.0    | 19.71 (13.27 to 25.96)            | 1.09 (1.06 to 1.13)           |
|                                                                | Sept-Nov 2020     |                 | 245.2     | 220.1    | 25.11 (18.29 to 31.73)            | 1.11 (1.08 to 1.15)           |
|                                                                | Dec 2020-Feb 2021 |                 | 245.6     | 202.2    | 43.42 (37.07 to 49.58)            | 1.21 (1.18 to 1.25)           |
| 5 (most)                                                       | Mar-May 2021      |                 | 259.1     | 222.0    | 37.05 (28.50 to 45.27)            | 1.17 (1.12 to 1.21)           |
|                                                                | Jun-Aug 2021      |                 | 232.2     | 207.0    | 25.25 (17.27 to 32.93)            | 1.12 (1.08 to 1.17)           |
|                                                                | Sept-Nov 2021     |                 | 243.4     | 219.0    | 24.39 (15.92 to 32.54)            | 1.11 (1.07 to 1.15)           |
|                                                                | Mar-May 2020      |                 | 307.3     | 311.7    | -4.39 (-11.90 to 2.94)            | 0.99 (0.96 to 1.01)           |
|                                                                | Jun-Aug 2020      |                 | 316.0     | 294.7    | 21.31 (14.19 to 28.25)            | 1.07 (1.05 to 1.10)           |
| 5 (most)                                                       | Sept-Nov 2020     |                 | 335.3     | 307.4    | 27.85 (20.41 to 35.12)            | 1.09 (1.06 to 1.12)           |
|                                                                | Dec 2020-Feb 2021 |                 | 323.6     | 283.3    | 40.25 (33.30 to 47.03)            | 1.14 (1.11 to 1.17)           |
|                                                                | Mar-May 2021      |                 | 339.0     | 309.0    | 29.94 (20.68 to 38.93)            | 1.10 (1.06 to 1.13)           |
|                                                                | Jun-Aug 2021      |                 | 308.9     | 292.1    | 16.75 (7.98 to 25.28)             | 1.06 (1.03 to 1.09)           |
|                                                                | Sept-Nov 2021     |                 | 315.4     | 304.8    | 10.66 (1.47 to 19.59)             | 1.03 (1.00 to 1.07)           |

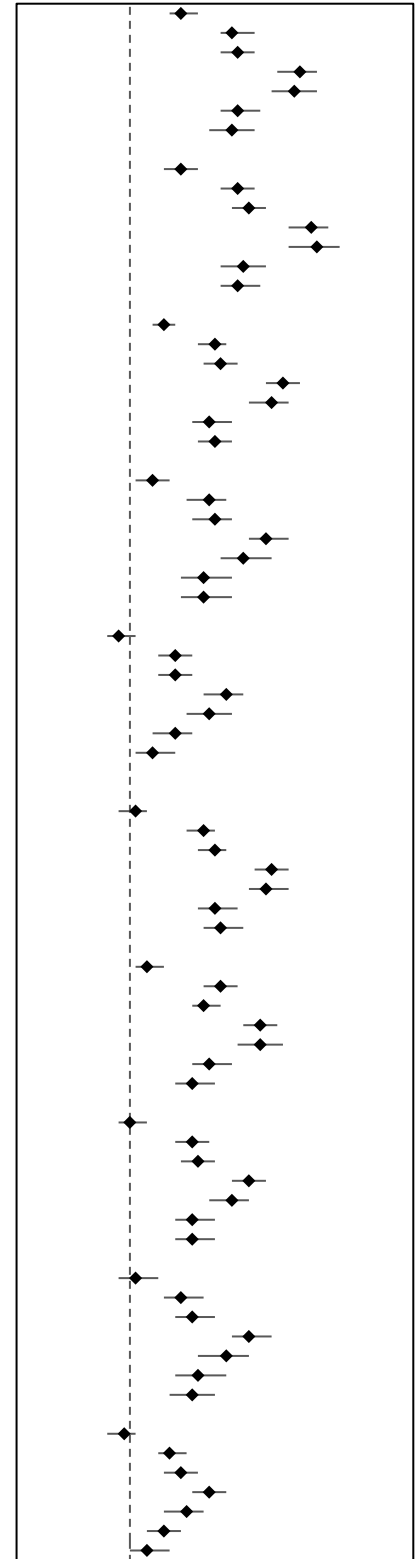

0.80 0.90 1.00 1.10 1.20 1.30 1.40 1.50  
Incidence rate ratio (95% CI)
